# Supplementary material for: Reduced global warming from CMIP6 projections when weighting models by performance and independence
Source: Copernicus journal article supplement (doi:10.5194/esd-11-995-2020), 2020-11-13
Supplement: Supplementary file 1 [file esd-11-995-2020-supplement.zip]

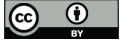

## *Supplement of*

# **Reduced global warming from CMIP6 projections when weighting models by performance and independence**

**Lukas Brunner et al.**

*Correspondence to:* Lukas Brunner ([lukas.brunner@env.ethz.ch](mailto:lukas.brunner@env.ethz.ch))

- [esd-11-995-2020-supplement-title-page.pdf](#)
- [supplement\\_final\\_v2](#)
  - [Brunner\\_et\\_al\\_supplement\\_final\\_v2.pdf](#)
  - [tableS4.csv](#)
  - [tableS5.csv](#)
  - [tableS6.csv](#)

The copyright of individual parts of the supplement might differ from the CC BY 4.0 License.
